# Supplementary material
Source: PubMed Central journal article supplement (PMC3268406)
Supplement: supp_M111.302224_jbc.M111.302224-1.pdf [file supp_M111.302224_jbc.M111.302224-1.pdf]

# Nanda and Miano Supplemental Figure 1

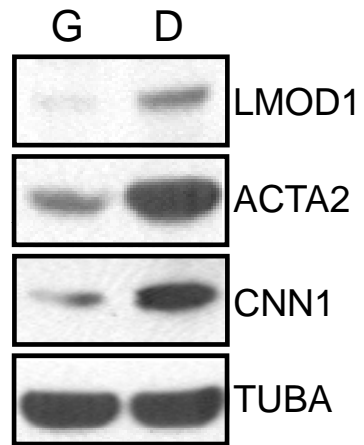

# Nanda and Miano Supplemental Figure 2

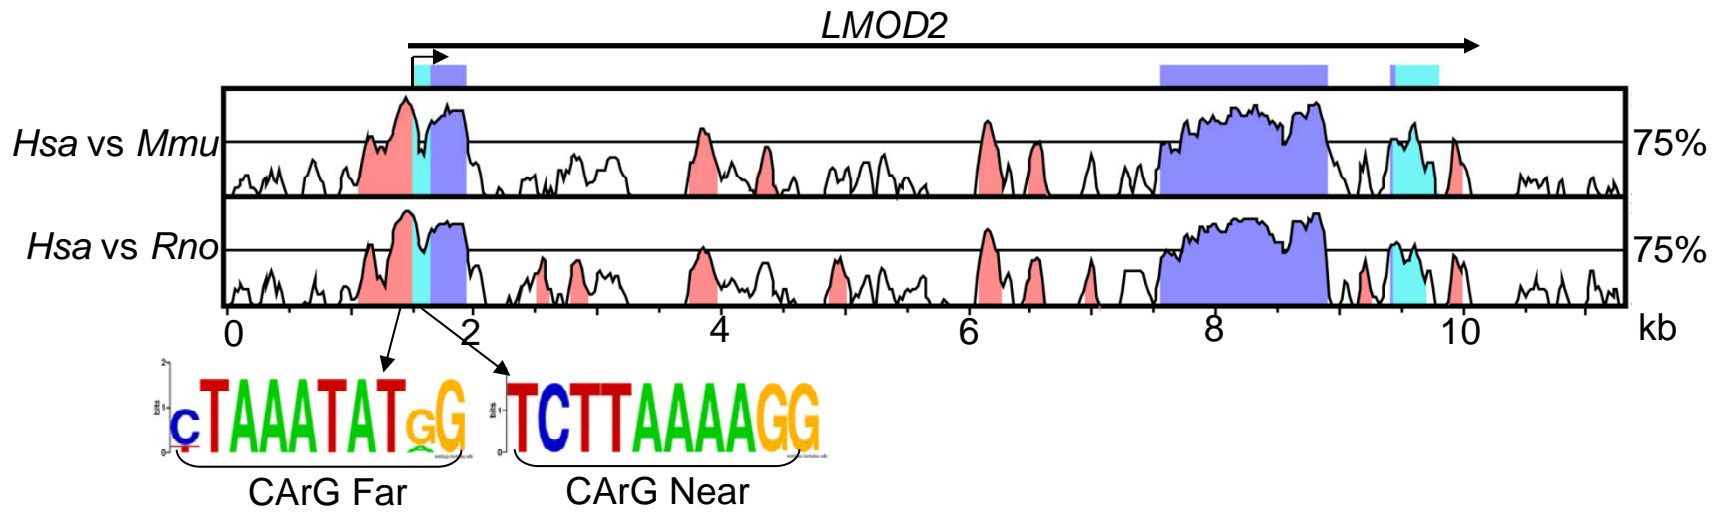

# Nanda and Miano Supplemental Figure 3

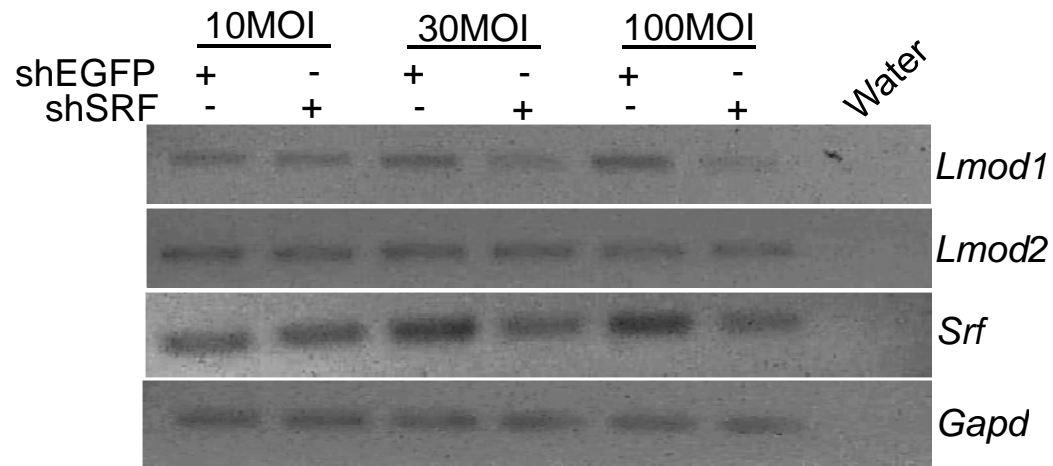

## Supplemental Figure Legends

**Supplemental Figure 1. LMOD1 protein expression in HCASM.** Western blot of LMOD1 from either growing (G) or differentiating (D) HCASM. Increases in LMOD1 with differentiation are accompanied by similar elevations in other SMC-restricted proteins (ACTA2, CNN1).

**Supplemental Figure 2. Comparative genomic analysis of human *LMOD2* gene.** VISTA plot revealing *Leiomodins* sequence homology between human (*Hsa*) and mouse (*Mmu*) and human (*Hsa*) and rat (*Rno*) over a 10-kb genomic interval, similar to that of *Leiomodin1* VISTA illustrated in Fig. 3A. Sequence logos of two CArG-like elements identified near the annotated transcription start site of *LMOD2* are shown below the VISTA plots. Each logo represents sequence conservation across six vertebrate species.

**Supplemental Figure 3. *Lmod1* and *Lmod2* mRNA expression following *Srf* knock down in C<sub>2</sub>C<sub>12</sub> cells.** RT-PCR analysis of *Lmod1*, *Lmod2* and *Srf* mRNA expression in differentiated C<sub>2</sub>C<sub>12</sub> cells transduced with increasing amounts of either shEFGP or shSRF for 72 h.

**Supplemental Table1.** List of Primers and Applications

| Gene                                 |            | Primer Sequence                                                                                                    | Application             | Product size (bp) |
|--------------------------------------|------------|--------------------------------------------------------------------------------------------------------------------|-------------------------|-------------------|
| <i>Lmod1</i> (mouse and rat)         | Fwd<br>Rev | GGAATCAAACGGACAAACAGCCCT<br>CTCCTCTTTCTTGCTGGGCTCCTT                                                               | RT-PCR                  | 500               |
| <i>Lmod2</i> (mouse and rat)         | Fwd<br>Rev | GATAC <b><i>GGATCC</i></b> CAGGGAGCTGGAAGACATTGAACCT<br>GATACA <b><i>AGCTT</i></b> GTTCTTCCACTGTTGCCGTTGGTT        | RT-PCR                  | 457               |
| <i>Lmod3</i> (mouse and rat)         | Fwd<br>Rev | GATAC <b><i>GGATCC</i></b> CATGGAAGTCATGGCCCCTGACC<br>GATACA <b><i>AGCTT</i></b> TCAATGTTGTTTCAGGTTGAGTTCCTTCATGTC | RT-PCR                  | 711               |
| <i>Cnn1</i> (mouse)                  | Fwd<br>Rev | ACTGGGTACAGATCAGCCTCT<br>TAGGCAGAGTTGTAGTAGTTG                                                                     | RT-PCR                  | 318               |
| <i>Gapd</i> (mouse and rat)          | Fwd<br>Rev | CGTGCCGCCTGGAGAAAC<br>TGGGAGTTGCTGTTGAAGTCG                                                                        | RT-PCR<br>and qPCR      | 136               |
| <i>Lmod1</i> (mouse and rat)         | Fwd<br>Rev | CAGAGGAATCAAACGGACAAACAG<br>GCTTGCTTTCATCCACAGACATC                                                                | qPCR                    | 120               |
| WT <i>LMOD1</i> promoter (human)     | Fwd<br>Rev | GATAC <b><i>CTCGAGG</i></b> TAAAATACGCTCTTGAACGTGC<br>GATACA <b><i>AGCTT</i></b> CTTGGCAAATGGGCTGTG                | PCR<br>cloning          | 540               |
| WT <i>LMOD2</i> promoter (human)     | Fwd<br>Rev | GATAC <b><i>CTCGAGT</i></b> AAGTACAGGCACTAATGTACACC<br>GATACA <b><i>AGCTT</i></b> TTGTCAGACCCAGAAGGAGCTTGA         | PCR<br>cloning          | 922               |
| WT <i>CNN1</i> Intronic CArG (human) | Fwd        | GCCGCCGCGCCTTATAAGGCGGCCTTGG<br>CCAAGGCCGCTTATAAGGCGCGGCGGC                                                        | EMSA                    |                   |
| WT <i>LMOD1</i> CArG Far (human)     | Fwd<br>Rev | GGCCCCTTGTCTTTAAAAGGCTAAACTGCT<br>AGCAGTTTAGCCTTTTAAAGACAAGGGGCC                                                   | EMSA                    |                   |
| Mutant <i>LMOD1</i> CArG Far (human) | Fwd<br>Rev | GGCCCCTTGT <b><i>gtc</i></b> TAAAAGGCTAAACTGCT<br>AGCAGTTTAGCCTTTT <b><i>Agac</i></b> ACAAGGGGCC                   | EMSA and<br>mutagenesis |                   |
| WT CArG Near (human)                 | Fwd<br>Rev | CTGCTCTGTACTAAATTTGGTCACGCAGCG<br>CGCTGCGTGACCAAATTTAGTACAGAGCAG                                                   | EMSA                    |                   |
| Mutant CArG Near (human)             | Fwd<br>Rev | CTGCTCTGT <b><i>Agtc</i></b> AATTTGGTCACGCAGCG<br>CGCTGCGTGACCAAAT <b><i>gac</i></b> TACAGAGCAG                    | EMSA and<br>mutagenesis |                   |
| <i>Srf</i> (rat)                     | Fwd<br>Rev | CCGTGCTCAATGCCTTCTC<br>GTCCAAGTTCACCACCTGTAG                                                                       | RT-PCR                  | 215               |
| <i>Srf</i> (mouse)                   | Fwd<br>Rev | CCACCACAGACCAGAGAATGAG<br>TCTTGAGCACAGTCCCGTTG                                                                     | RT-PCR                  | 285               |
| <i>LMOD1</i> (human)                 | Fwd<br>Rev | ATTCACTCTCACCAGCTACCCAGA<br>ATGTGGTCCCTGTGGGACATCTT                                                                | RT-PCR                  | 502               |
| <i>LMOD2</i> (human)                 | Fwd<br>Rev | TCAAGCTCCTTCTGGGTCTGACAA<br>CTCCATTGCTGCCATTGGTCAA                                                                 | RT-PCR                  | 578               |
| <i>GAPD</i> (human)                  | Fwd<br>Rev | CGCTCTCTGCTCCTCCTGTTT<br>TTGACTCCGACCTTCACCTTCC                                                                    | RT-PCR                  | 103               |

Bold italicized font represents restriction enzymes immediately following the cloning clamp

Bold lowercase font represents mutations in CArG boxes for luciferase and EMSA
